# Supplementary material for: Characterization, Hypoglycemic Activity, and Antioxidant Activity of Methanol Extracts From Amomum tsao-ko: in vitro and in vivo Studies
Source: Frontiers journal article supplement (doi:10.3389/fnut.2022.869749), 2022-07-12

**Supplementary Figure 1. Study flow chart and design of in vivo hypoglycemic activity evaluation**

Con, control group; HFD, high fat diet; Mod, model group; PMEAT-L, low dose PMEAT group; PMEAT-H, high dose PMEAT group.

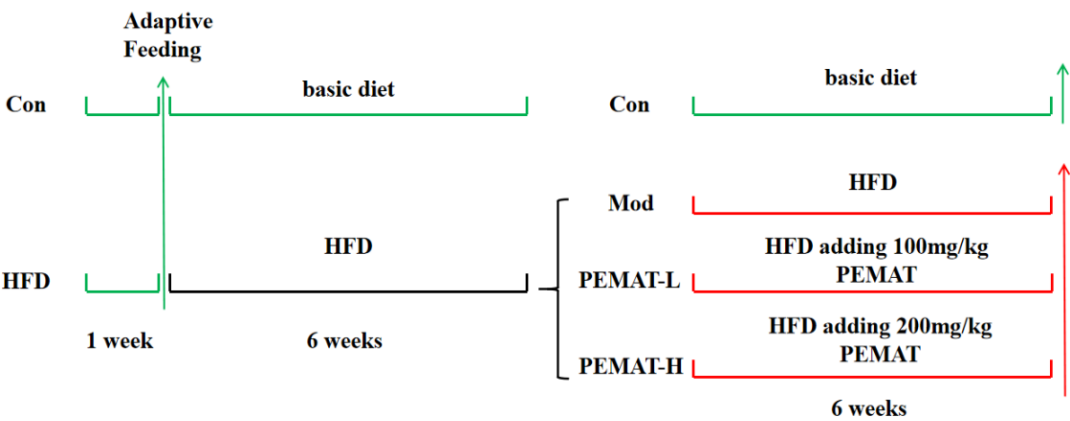

**Supplementary Figure 2. Study flow chart and design of in vivo anti-oxidant activity evaluation**

Con, control group; HFD, high fat diet; Mod, model group; PMEAT-L, low dose PMEAT group; PMEAT-H, high dose PMEAT group.

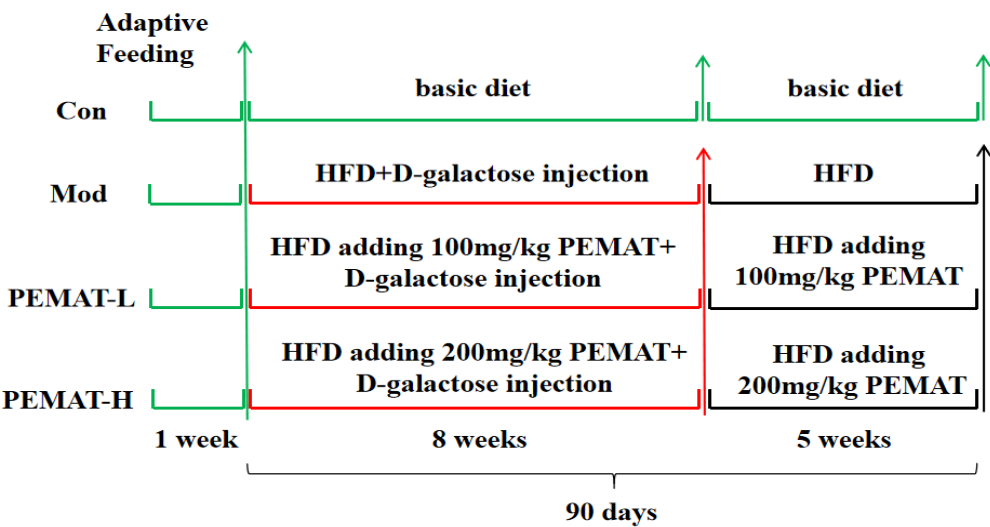

Supplement: Presentation_1.pdf [file Presentation_1.pdf]
